# Supplementary material for: mRNA-1273 vaccination protects against SARS-CoV-2–elicited lung inflammation in nonhuman primates
Source: PubMed Central journal article supplement (PMC9310526; doi:10.1172/jci.insight.160039), 2022-07-08
Supplement: jciinsight-7-160039-s121.pdf [file jciinsight-7-160039-s121.pdf]

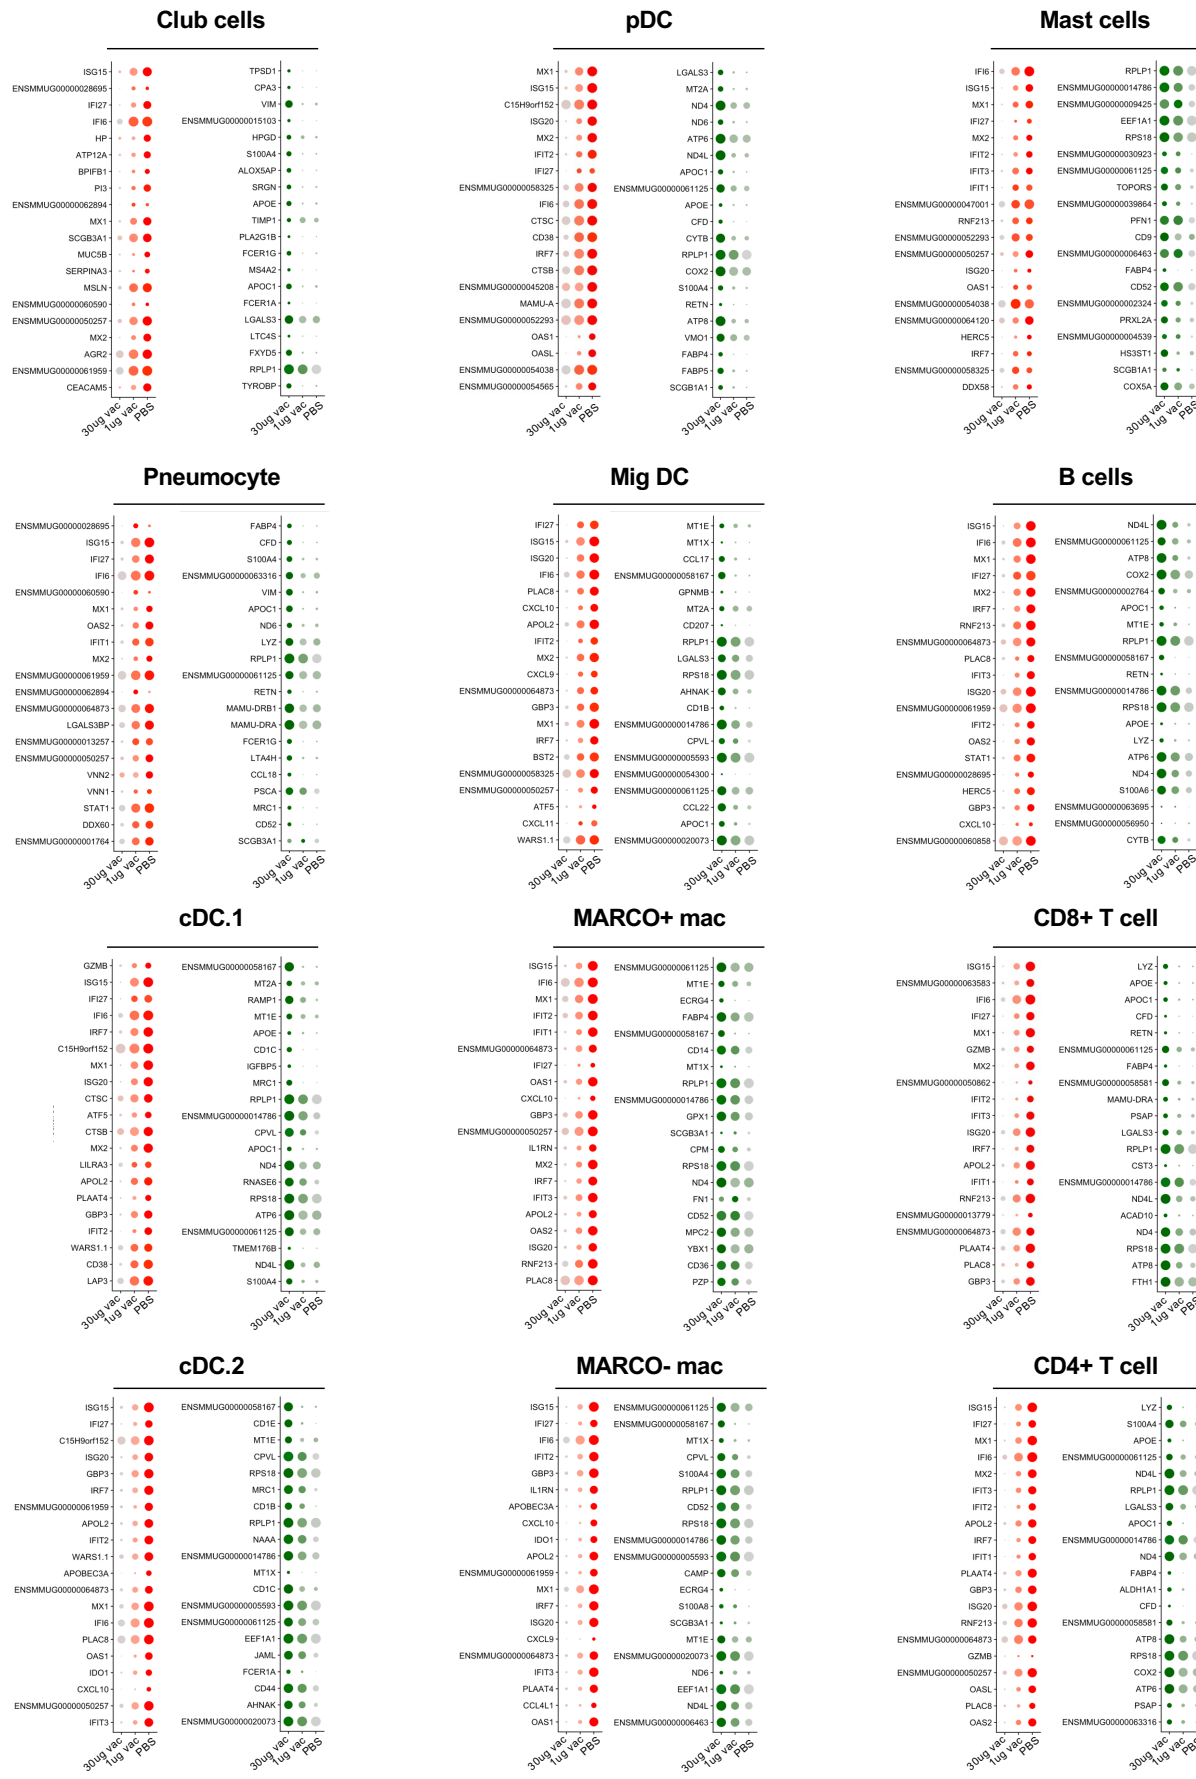

**Supplemental Figure 1: Differential gene expression analysis, day 2 post SARS-CoV-2 challenge.** The top 20 differentially expressed genes observed to be higher in unvaccinated animals than in the 30ug mRNA-1273 vaccinated animals on day 2 post challenge are shown in red. The top 20 differentially expressed genes observed to be higher in the 30ug mRNA-1273 vaccinated animals than in the unvaccinated animals on day 2 post challenge are shown in green.

## Myeloid cells

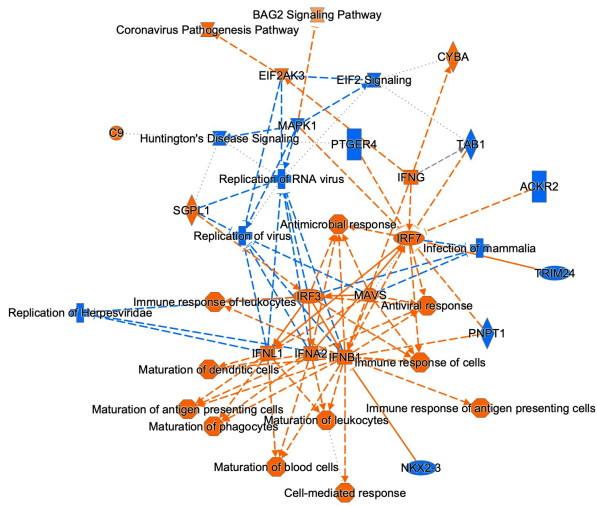

## Dendritic cells

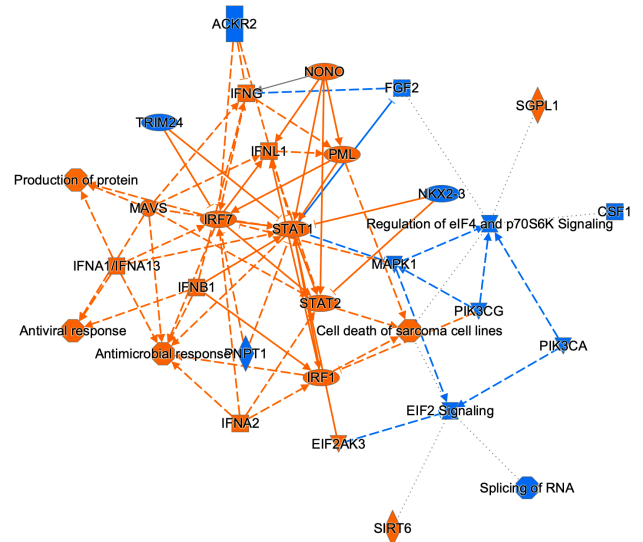

## Lymphocytes

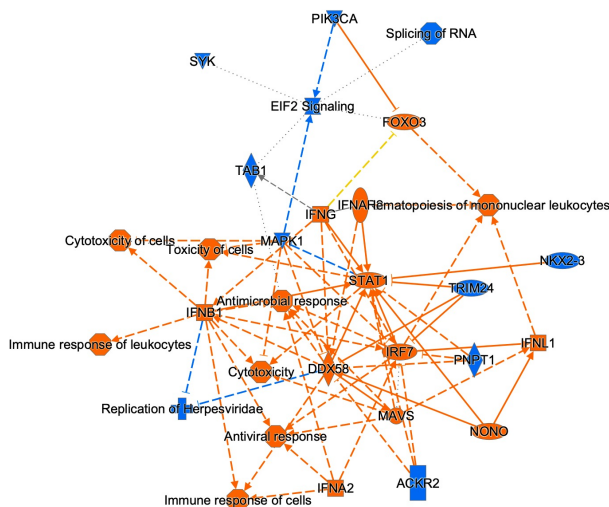

## Epithelial cells

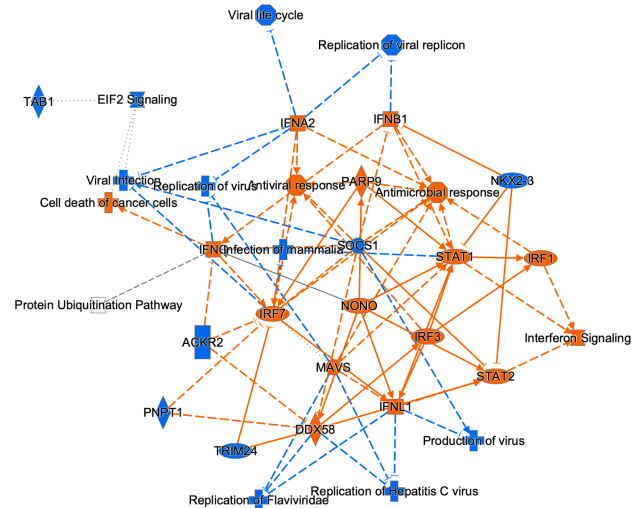

**Supplemental Figure 2: Graphical summary of cell signaling networks impacted by SARS-CoV-2 infection in unvaccinated animals (day 2 post challenge) relative to uninfected animals.** Differential gene expression analysis was performed to identify genes induced or suppressed by SARS-CoV-2 infection relative to uninfected animals. The resultant differentially expressed genes were analyzed using the Ingenuity Pathway Analysis (IPA) software package. **Orange nodes:** cell processes activated by SARS-CoV-2 infection relative to uninfected animals. **Blue nodes:** cell processes inhibited by SARS-CoV-2 infection relative to uninfected animals. **Orange lines:** interactions that lead to activation of connected nodes. **Blue line:** interactions that lead to inhibition of connected nodes. **Solid line:** direct interaction. **Dashed line:** indirect interaction.

### Myeloid cells

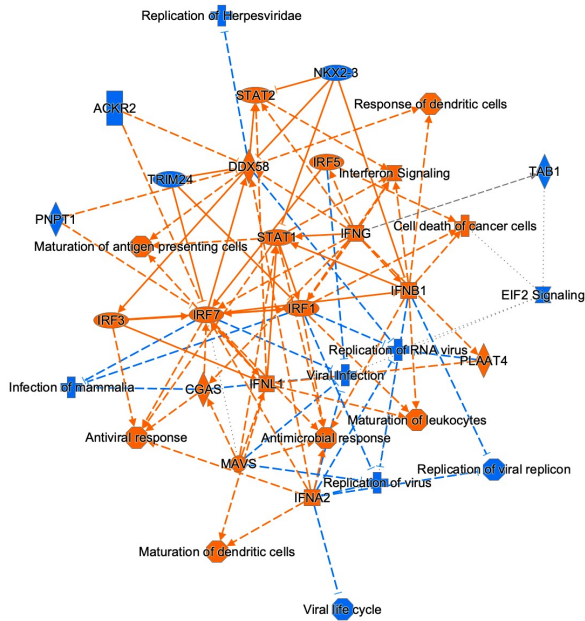

### Dendritic cells

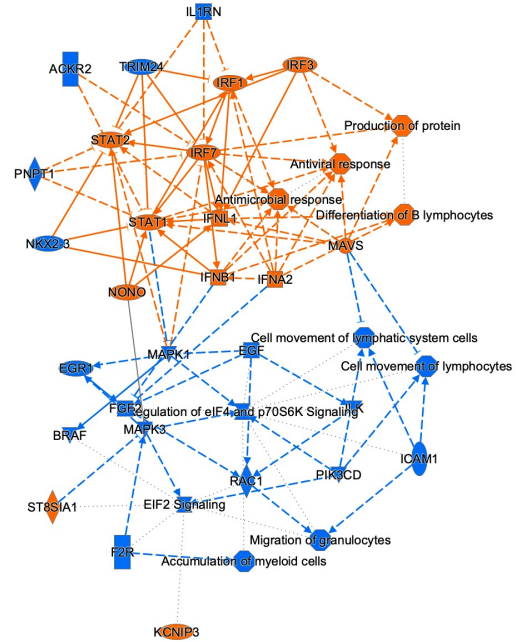

### Lymphocytes

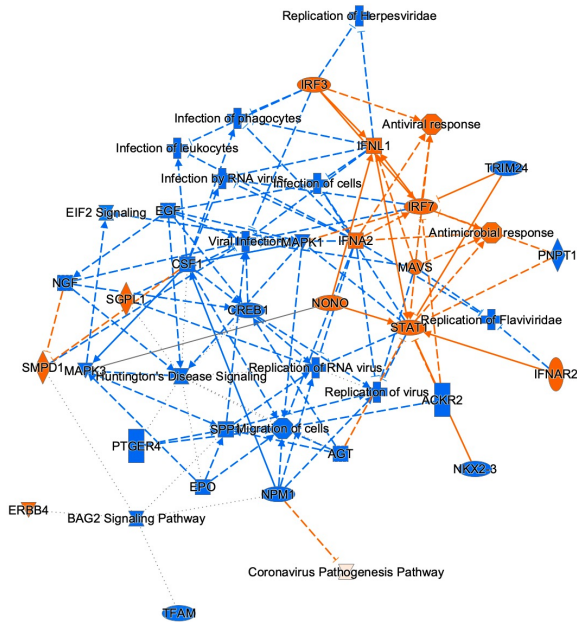

### Epithelial cells

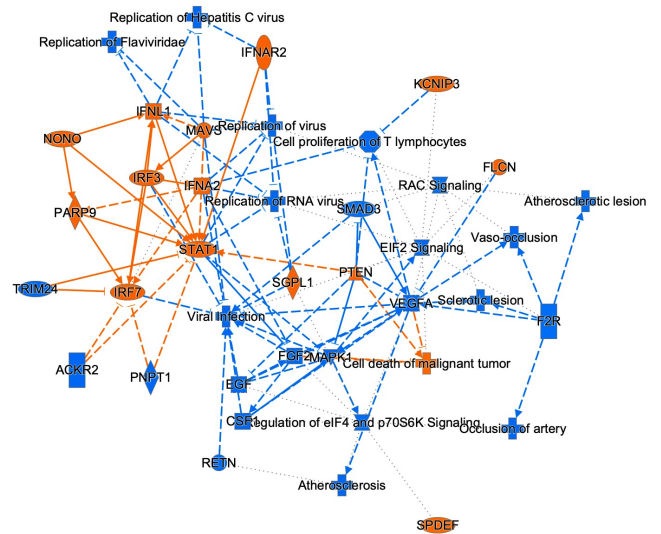

**Supplemental Figure 3: Graphical summary of cell signaling networks impacted by SARS-CoV-2 infection in unvaccinated animals (day 2 post challenge) relative to vaccinated animals (day 2 post infection).** Differential gene expression analysis was performed to identify genes induced or suppressed by SARS-CoV-2 infection relative to animals who were fully vaccinated and challenged with the same dose of SARS-CoV-2. The resultant differentially expressed genes were analyzed using the Ingenuity Pathway Analysis (IPA) software package. **Orange nodes:** cell processes activated by SARS-CoV-2 infection relative to un-infected animals. **Blue nodes:** cell processes inhibited by SARS-CoV-2 infection relative to un-infected animals. **Orange lines:** interactions that lead to activation of connected nodes. **Blue line:** interactions that lead to inhibition of connected nodes. **Solid line:** direct interaction. **Dashed line:** indirect interaction.

**A**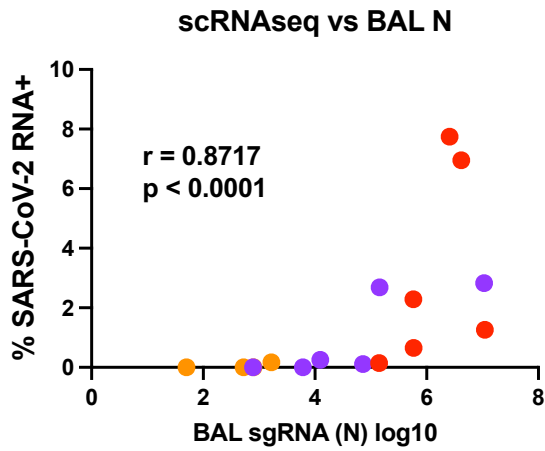**B**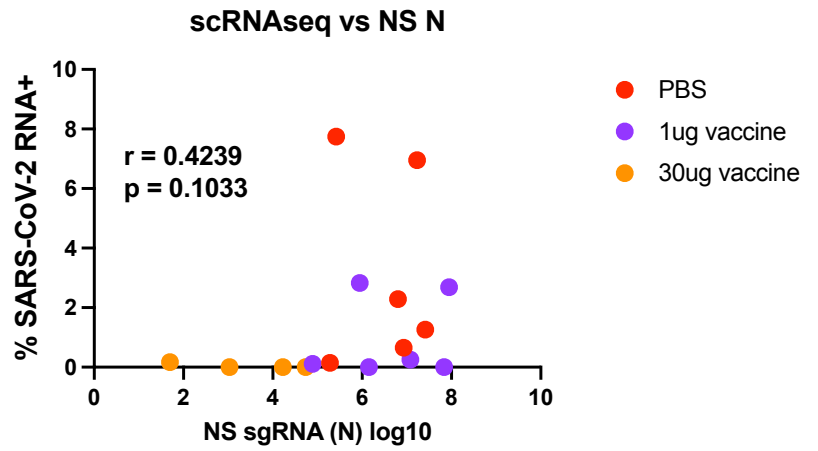

**Supplemental Figure 4:** Relationship between PCR and scRNAseq viral loads, day 2 post challenge. A) Relationship between BAL RNA load (N) and frequency of SARS-CoV-2 RNA+ cells. B) Relationship between NS RNA load (N) and frequency of SARS-CoV-2 RNA+ cells. Spearman correlation

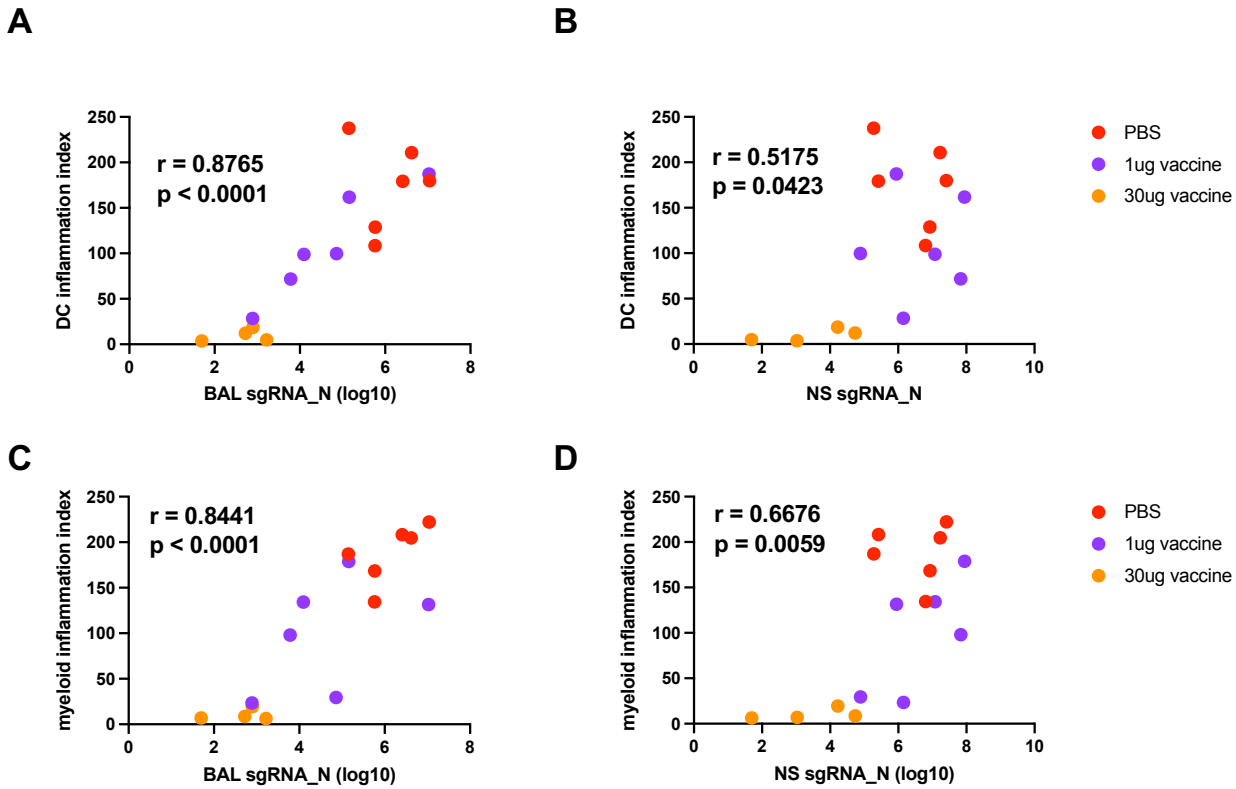

**Supplemental Figure 5: viral load vs inflammation scores, day 2 post infection. A)** DC Inflammation index score vs BAL sgRNA (N gene). **B)** DC Inflammation index score vs NS sgRNA (N gene). **C)** Macrophage Inflammation index score vs BAL sgRNA (N gene). **D)** Macrophage Inflammation index score vs NS sgRNA (N gene). Spearman correlation

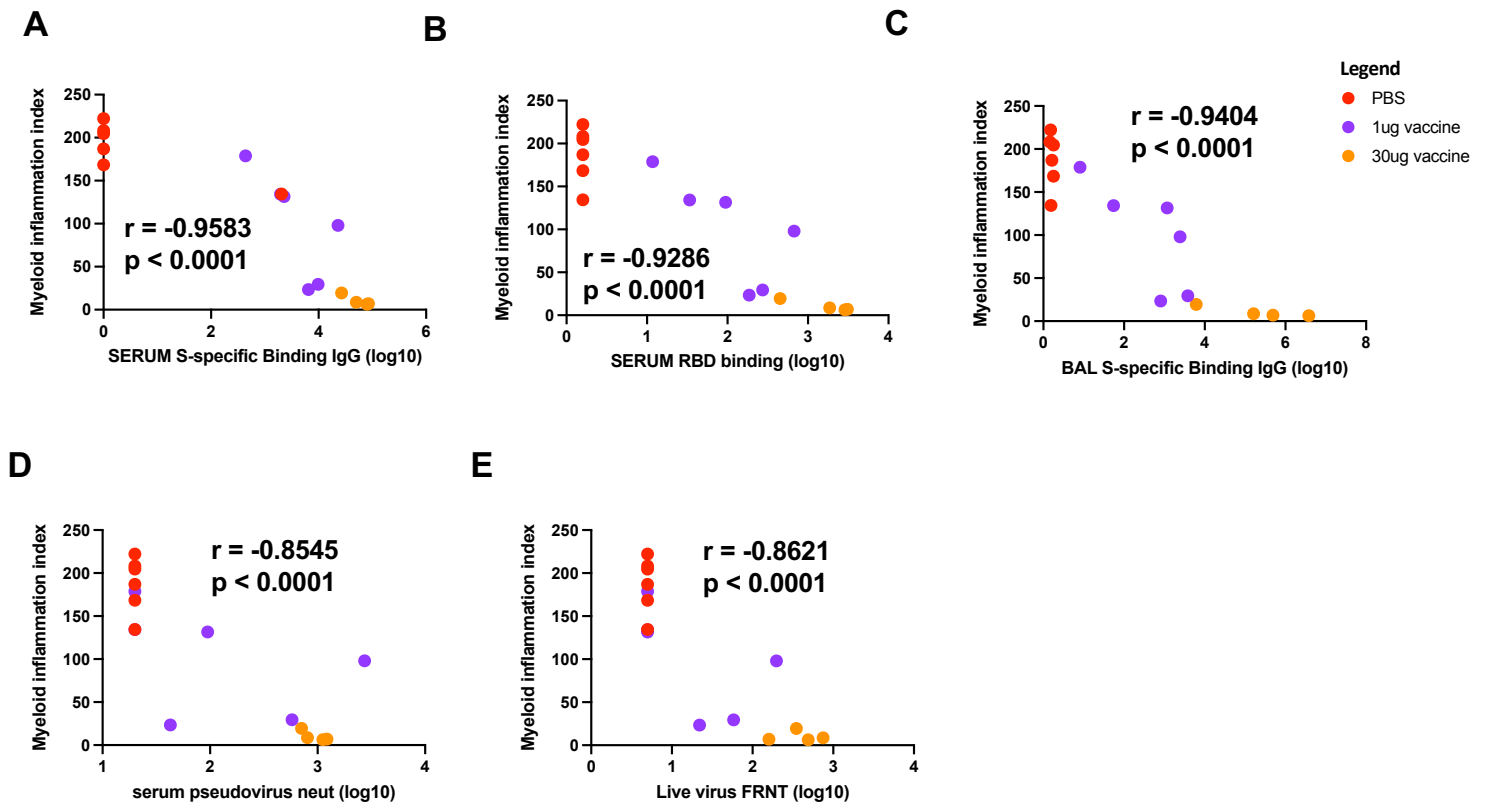

**Supplemental Figure 6. Relationship between antibody titers and SARS-CoV-2 elicited inflammation.** **A)** Relationship between pre-challenge serum S-specific IgG titers (wk 8 post vaccination) and myeloid inflammation on day 2 post challenge. **B)** Relationship between pre-challenge serum RBD-specific IgG titers (wk 8 post vaccination) and myeloid inflammation on day 2 post challenge. **C)** Relationship between pre-challenge BALF S-specific IgG titers (wk 6 post vaccination) and myeloid inflammation on day 2 post challenge. **D)** Relationship between pre-challenge serum pseudovirus neut titers titers (wk 8 post vaccination) and myeloid inflammation on day 2 post challenge. **E)** Relationship between pre-challenge serum live virus FRNT (wk 8 post vaccination) and myeloid inflammation on day 2 post challenge. Spearman correlation

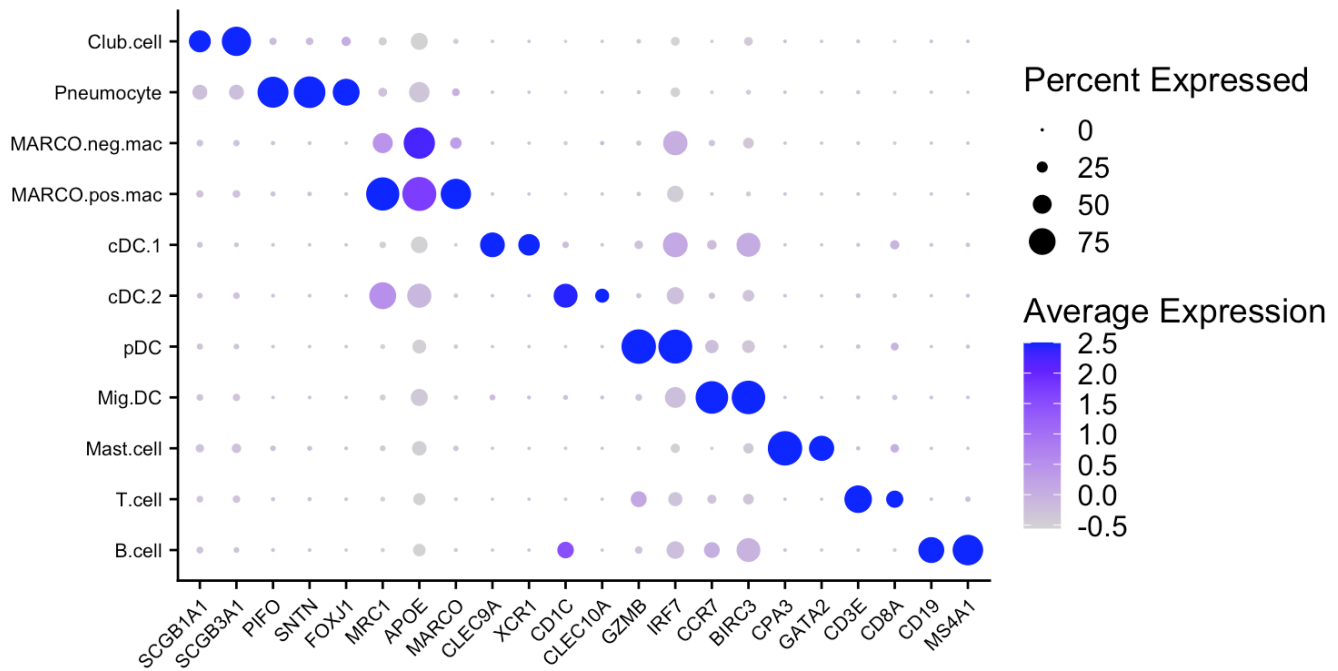

**Supplemental Figure 7: identification and quantification of BALF cells by scRNAseq.**

Expression of key lineage specific genes in all annotated cell types in BALF collected post SARS-CoV-2 strain B.1.351/beta challenge



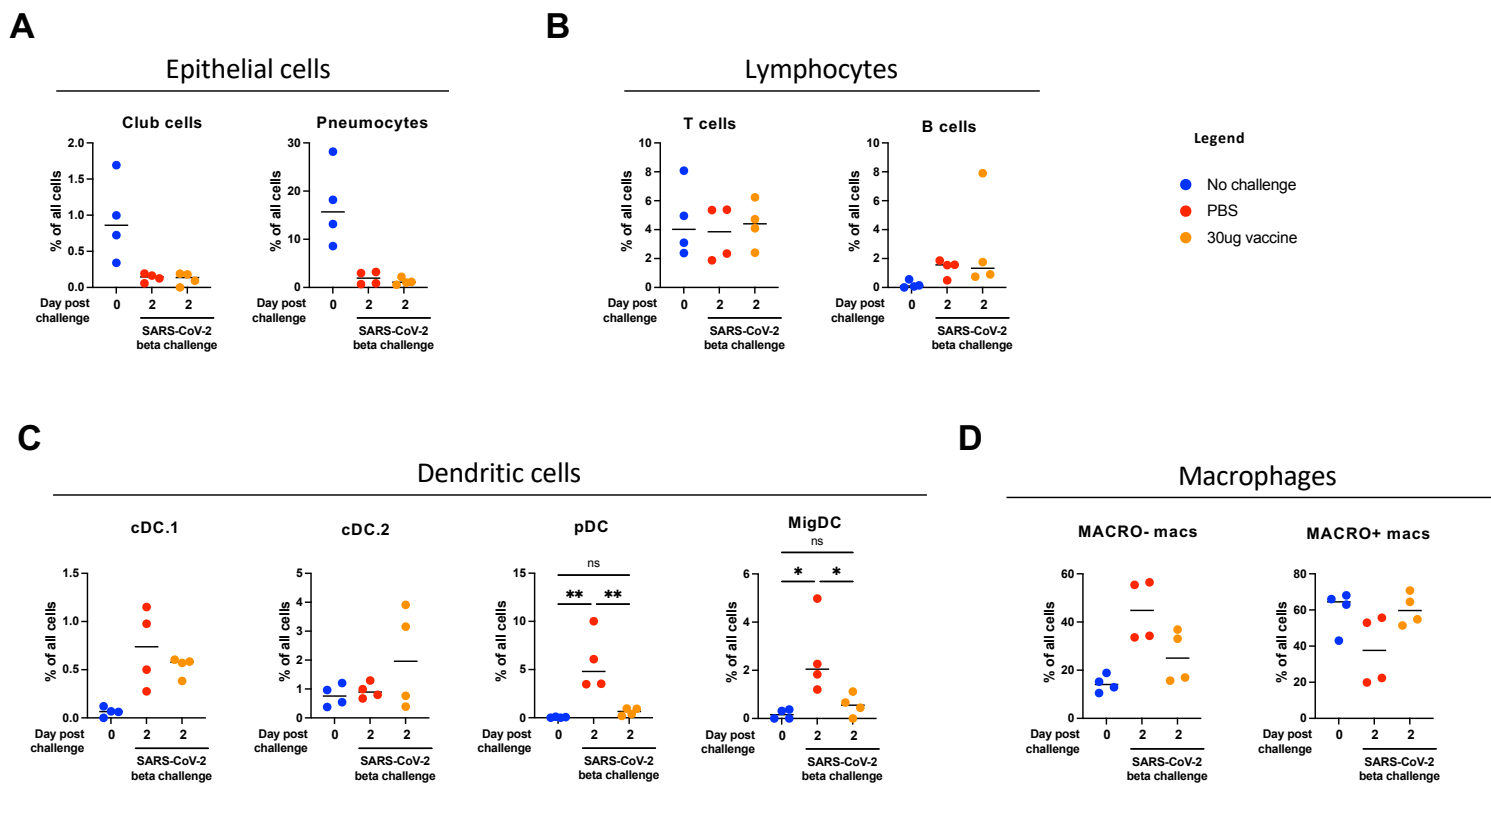

**Supplemental Figure 8: identification and quantification of BALF cells by scRNAseq following B.1.351/beta infection. A) Frequency of epithelial cell populations. B) Frequency of lymphocyte cell populations. C) Frequency of dendritic cell populations. D) Frequency of macrophage populations. \*\* p < 0.01, \* p < 0.05, one-way ANOVA with correction for multiple comparisons**



A) B)

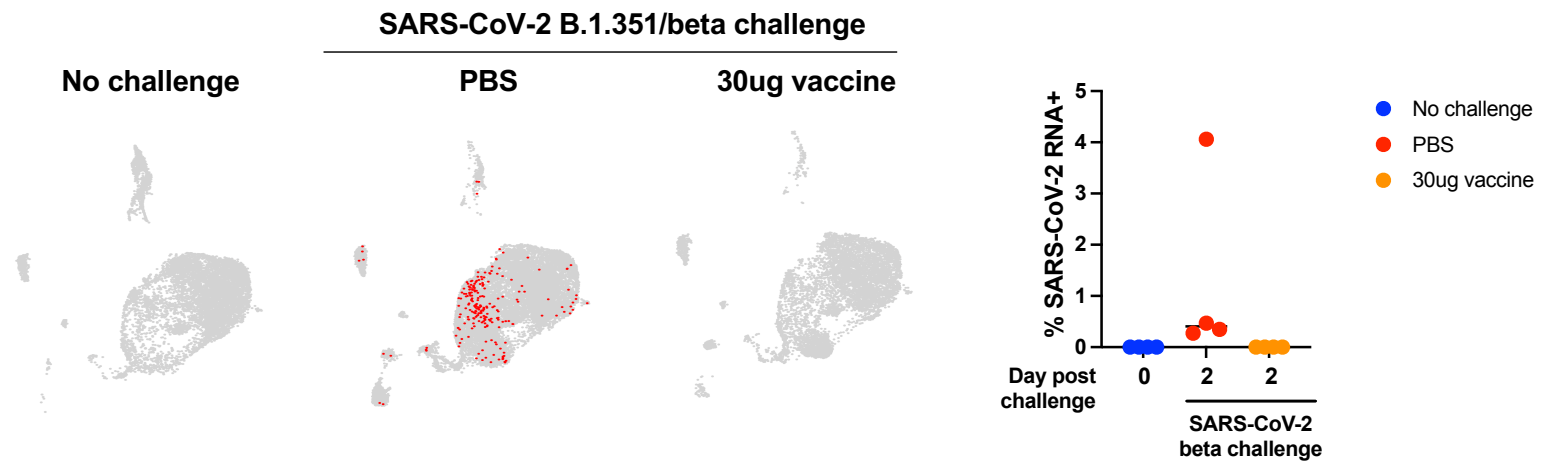

**Supplemental Figure 9: identification and quantification of SARS-CoV-2 B.1.351/beta variant RNA<sup>+</sup> cells. A) Location of SARS-CoV-2 RNA<sup>+</sup> cells. B) Frequency of SARS-CoV-2 RNA<sup>+</sup> cell following SARS-CoV-2 B.1.351 challenge**

**Supplemental Table 1: Cellular networks impacted by SARS-CoV-2 infection within myeloid cells in unvaccinated animals (day 2 post challenge) relative to un-infected animals**

| <b>Ingenuity Canonical Pathways</b>                                          | <b>-log(p-value)</b> | <b>Ratio</b> | <b>z-score</b> |
|------------------------------------------------------------------------------|----------------------|--------------|----------------|
| EIF2 Signaling                                                               | 5.06E+01             | 3.97E-01     | -5.461         |
| BAG2 Signaling Pathway                                                       | 2.67E+01             | 4.76E-01     | 0.905          |
| Coronavirus Pathogenesis Pathway                                             | 2.52E+01             | 2.91E-01     | 2.517          |
| FAT10 Signaling Pathway                                                      | 2.47E+01             | 5.71E-01     | 1              |
| Mitochondrial Dysfunction                                                    | 1.99E+01             | 2.81E-01     | NaN            |
| Huntington's Disease Signaling                                               | 1.94E+01             | 2.19E-01     | -2.5           |
| Oxidative Phosphorylation                                                    | 1.83E+01             | 3.33E-01     | 0.164          |
| Regulation of eIF4 and p70S6K Signaling                                      | 1.82E+01             | 2.63E-01     | -0.632         |
| Sirtuin Signaling Pathway                                                    | 1.80E+01             | 2.09E-01     | 0.905          |
| mTOR Signaling                                                               | 1.58E+01             | 2.26E-01     | -0.5           |
| Inhibition of ARE-Mediated mRNA Degradation Pathway                          | 1.54E+01             | 2.55E-01     | 0              |
| Protein Ubiquitination Pathway                                               | 1.54E+01             | 2.00E-01     | NaN            |
| Role of Hypercytokinemia/hyperchemokineemia in the Pathogenesis of Influenza | 1.46E+01             | 3.37E-01     | 5.014          |
| Role of PKR in Interferon Induction and Antiviral Response                   | 1.42E+01             | 2.65E-01     | 2.414          |
| Interferon Signaling                                                         | 1.28E+01             | 5.00E-01     | 3.153          |
| Glucocorticoid Receptor Signaling                                            | 1.15E+01             | 1.34E-01     | NaN            |
| TREM1 Signaling                                                              | 1.14E+01             | 3.12E-01     | 3.838          |
| Estrogen Receptor Signaling                                                  | 1.06E+01             | 1.47E-01     | 0.801          |
| Production of Nitric Oxide and Reactive Oxygen Species in Macrophages        | 1.02E+01             | 1.94E-01     | 2.959          |
| NRF2-mediated Oxidative Stress Response                                      | 9.05E+00             | 1.69E-01     | 0.408          |
| Unfolded protein response                                                    | 9.00E+00             | 2.56E-01     | 1.807          |
| Acute Phase Response Signaling                                               | 8.77E+00             | 1.84E-01     | 2.353          |
| Activation of IRF by Cytosolic Pattern Recognition Receptors                 | 8.61E+00             | 2.92E-01     | 1.698          |
| HIF1 $\alpha$ Signaling                                                      | 8.51E+00             | 1.73E-01     | 1.029          |
| iNOS Signaling                                                               | 8.42E+00             | 3.40E-01     | 2.309          |
| Death Receptor Signaling                                                     | 8.41E+00             | 2.40E-01     | 2.065          |
| Hepatic Fibrosis Signaling Pathway                                           | 8.28E+00             | 1.33E-01     | 1.54           |
| LXR/RXR Activation                                                           | 8.17E+00             | 2.11E-01     | -0.229         |
| Ferroptosis Signaling Pathway                                                | 8.13E+00             | 2.05E-01     | -0.392         |
| Neuroinflammation Signaling Pathway                                          | 8.11E+00             | 1.45E-01     | 4.111          |

**Supplemental Table 2: Cellular networks impacted by SARS-CoV-2 infection within Dendritic Cells in unvaccinated animals (day 2 post challenge) relative to un-infected animals**

| <b>Ingenuity Canonical Pathways</b>                                          | <b>-log(p-value)</b> | <b>Ratio</b> | <b>z-score</b> |
|------------------------------------------------------------------------------|----------------------|--------------|----------------|
| EIF2 Signaling                                                               | 3.52E+01             | 4.20E-01     | -5.181         |
| Mitochondrial Dysfunction                                                    | 2.47E+01             | 4.04E-01     | NaN            |
| Oxidative Phosphorylation                                                    | 2.06E+01             | 4.50E-01     | 2.263          |
| Huntington's Disease Signaling                                               | 1.84E+01             | 2.90E-01     | -0.6           |
| Regulation of eIF4 and p70S6K Signaling                                      | 1.76E+01             | 3.41E-01     | -2.138         |
| FAT10 Signaling Pathway                                                      | 1.74E+01             | 5.71E-01     | 0.447          |
| Coronavirus Pathogenesis Pathway                                             | 1.71E+01             | 3.20E-01     | 0.126          |
| Protein Ubiquitination Pathway                                               | 1.69E+01             | 2.84E-01     | NaN            |
| BAG2 Signaling Pathway                                                       | 1.68E+01             | 4.64E-01     | 1.387          |
| Sirtuin Signaling Pathway                                                    | 1.64E+01             | 2.74E-01     | -0.651         |
| Inhibition of ARE-Mediated mRNA Degradation Pathway                          | 1.53E+01             | 3.35E-01     | -0.756         |
| mTOR Signaling                                                               | 1.31E+01             | 2.83E-01     | -0.816         |
| Estrogen Receptor Signaling                                                  | 1.21E+01             | 2.20E-01     | 1.432          |
| Role of PKR in Interferon Induction and Antiviral Response                   | 1.07E+01             | 3.09E-01     | 0              |
| CLEAR Signaling Pathway                                                      | 1.01E+01             | 2.32E-01     | 1.364          |
| Phagosome Maturation                                                         | 1.00E+01             | 2.83E-01     | NaN            |
| Glucocorticoid Receptor Signaling                                            | 9.26E+00             | 1.84E-01     | NaN            |
| PI3K/AKT Signaling                                                           | 9.06E+00             | 2.51E-01     | -0.354         |
| Interferon Signaling                                                         | 8.77E+00             | 5.00E-01     | 3.153          |
| Unfolded protein response                                                    | 8.76E+00             | 3.33E-01     | 1.698          |
| Insulin Secretion Signaling Pathway                                          | 8.70E+00             | 2.23E-01     | 4.648          |
| Role of Hypercytokinemia/hyperchemokineemia in the Pathogenesis of Influenza | 8.62E+00             | 3.37E-01     | 2.785          |
| Production of Nitric Oxide and Reactive Oxygen Species in Macrophages        | 7.78E+00             | 2.41E-01     | -1.372         |
| FcγR Receptor-mediated Phagocytosis in Macrophages and Monocytes             | 7.63E+00             | 3.09E-01     | 0.186          |
| HER-2 Signaling in Breast Cancer                                             | 7.47E+00             | 2.25E-01     | 0.295          |
| Hypoxia Signaling in the Cardiovascular System                               | 7.28E+00             | 3.29E-01     | 1              |
| Toll-like Receptor Signaling                                                 | 7.03E+00             | 3.21E-01     | 0              |
| ERK/MAPK Signaling                                                           | 6.92E+00             | 2.22E-01     | -0.48          |
| Actin Cytoskeleton Signaling                                                 | 6.76E+00             | 2.12E-01     | -0.926         |
| Necroptosis Signaling Pathway                                                | 6.61E+00             | 2.42E-01     | 2.596          |

**Supplemental Table 3: Cellular networks impacted by SARS-CoV-2 infection within lymphocytes in unvaccinated animals (day 2 post challenge) relative to un-infected animals**

| Ingenuity Canonical Pathways                                                 | -log(p-value) | Ratio    | z-score |
|------------------------------------------------------------------------------|---------------|----------|---------|
| EIF2 Signaling                                                               | 2.72E+01      | 2.99E-01 | -3.244  |
| FAT10 Signaling Pathway                                                      | 2.49E+01      | 5.89E-01 | 0       |
| BAG2 Signaling Pathway                                                       | 2.41E+01      | 4.64E-01 | 0       |
| Inhibition of ARE-Mediated mRNA Degradation Pathway                          | 1.88E+01      | 2.92E-01 | -2.132  |
| Coronavirus Pathogenesis Pathway                                             | 1.86E+01      | 2.61E-01 | 0.42    |
| Huntington's Disease Signaling                                               | 1.69E+01      | 2.16E-01 | -0.832  |
| Mitochondrial Dysfunction                                                    | 1.61E+01      | 2.63E-01 | NaN     |
| Sirtuin Signaling Pathway                                                    | 1.56E+01      | 2.05E-01 | 1.605   |
| Oxidative Phosphorylation                                                    | 1.53E+01      | 3.15E-01 | -0.845  |
| Protein Ubiquitination Pathway                                               | 1.50E+01      | 2.07E-01 | NaN     |
| Death Receptor Signaling                                                     | 1.39E+01      | 3.23E-01 | 1.347   |
| PI3K Signaling in B Lymphocytes                                              | 1.17E+01      | 2.45E-01 | 2.414   |
| Glucocorticoid Receptor Signaling                                            | 1.13E+01      | 1.41E-01 | NaN     |
| Role of PKR in Interferon Induction and Antiviral Response                   | 1.02E+01      | 2.35E-01 | 1.134   |
| Regulation of eIF4 and p70S6K Signaling                                      | 9.96E+00      | 2.07E-01 | -1.897  |
| Interferon Signaling                                                         | 9.92E+00      | 4.44E-01 | 2.84    |
| Apoptosis Signaling                                                          | 9.77E+00      | 2.60E-01 | 0       |
| Activation of IRF by Cytosolic Pattern Recognition Receptors                 | 9.67E+00      | 3.23E-01 | 1.606   |
| Estrogen Receptor Signaling                                                  | 9.11E+00      | 1.47E-01 | 0.667   |
| Role of Hypercytokinemia/hyperchemokineemia in the Pathogenesis of Influenza | 8.70E+00      | 2.67E-01 | 3.962   |
| Natural Killer Cell Signaling                                                | 8.61E+00      | 1.86E-01 | 1.029   |
| Primary Immunodeficiency Signaling                                           | 8.34E+00      | 3.21E-01 | NaN     |
| JAK/STAT Signaling                                                           | 7.64E+00      | 2.56E-01 | 1.606   |
| TNFR2 Signaling                                                              | 7.59E+00      | 4.06E-01 | 1.265   |
| Production of Nitric Oxide and Reactive Oxygen Species in Macrophages        | 7.47E+00      | 1.78E-01 | 1.512   |
| mTOR Signaling                                                               | 7.33E+00      | 1.70E-01 | -1.155  |
| HER-2 Signaling in Breast Cancer                                             | 7.03E+00      | 1.63E-01 | 2       |
| Sumoylation Pathway                                                          | 6.46E+00      | 2.14E-01 | 0.258   |
| Induction of Apoptosis by HIV1                                               | 6.45E+00      | 2.62E-01 | -1.069  |
| Ferroptosis Signaling Pathway                                                | 6.19E+00      | 1.89E-01 | -0.816  |

**Supplemental Table 4: Cellular networks impacted by SARS-CoV-2 infection within epithelial cells in unvaccinated animals (day 2 post challenge) relative to un-infected animals**

| Ingenuity Canonical Pathways                                                 | -log(p-value) | Ratio    | z-score |
|------------------------------------------------------------------------------|---------------|----------|---------|
| EIF2 Signaling                                                               | 2.79E+01      | 2.46E-01 | -4.596  |
| Coronavirus Pathogenesis Pathway                                             | 1.37E+01      | 1.77E-01 | 0.667   |
| Protein Ubiquitination Pathway                                               | 1.03E+01      | 1.35E-01 | NaN     |
| Oxidative Phosphorylation                                                    | 8.79E+00      | 1.89E-01 | -0.218  |
| Interferon Signaling                                                         | 8.23E+00      | 3.33E-01 | 3.317   |
| Mitochondrial Dysfunction                                                    | 7.91E+00      | 1.46E-01 | NaN     |
| BAG2 Signaling Pathway                                                       | 7.70E+00      | 2.02E-01 | 1.414   |
| Role of Hypercytokinemia/hyperchemokineemia in the Pathogenesis of Influenza | 7.54E+00      | 1.98E-01 | 3.638   |
| Sirtuin Signaling Pathway                                                    | 7.36E+00      | 1.13E-01 | -0.6    |
| Regulation of eIF4 and p70S6K Signaling                                      | 6.89E+00      | 1.34E-01 | NaN     |
| FAT10 Signaling Pathway                                                      | 6.77E+00      | 2.32E-01 | NaN     |
| Huntington's Disease Signaling                                               | 6.65E+00      | 1.10E-01 | -1.414  |
| mTOR Signaling                                                               | 6.63E+00      | 1.23E-01 | -0.816  |
| Role of PKR in Interferon Induction and Antiviral Response                   | 5.86E+00      | 1.40E-01 | 0.688   |
| Unfolded protein response                                                    | 5.73E+00      | 1.67E-01 | 3.317   |
| Activation of IRF by Cytosolic Pattern Recognition Receptors                 | 5.18E+00      | 1.85E-01 | 1.155   |
| Antigen Presentation Pathway                                                 | 4.84E+00      | 2.31E-01 | NaN     |
| Glucocorticoid Receptor Signaling                                            | 4.03E+00      | 7.23E-02 | NaN     |
| Putrescine Degradation III                                                   | 3.83E+00      | 2.73E-01 | -2.449  |
| NRF2-mediated Oxidative Stress Response                                      | 3.82E+00      | 9.28E-02 | 0.258   |
| Aryl Hydrocarbon Receptor Signaling                                          | 3.80E+00      | 1.07E-01 | 0.632   |
| Telomere Extension by Telomerase                                             | 3.72E+00      | 3.33E-01 | NaN     |
| Coronavirus Replication Pathway                                              | 3.52E+00      | 1.78E-01 | 0.707   |
| Complement System                                                            | 3.31E+00      | 1.89E-01 | -0.378  |
| Inhibition of ARE-Mediated mRNA Degradation Pathway                          | 3.25E+00      | 9.94E-02 | 0.378   |
| Aldosterone Signaling in Epithelial Cells                                    | 3.17E+00      | 9.76E-02 | NaN     |
| Hypoxia Signaling in the Cardiovascular System                               | 3.16E+00      | 1.32E-01 | 2       |
| Phagosome Maturation                                                         | 2.86E+00      | 9.43E-02 | NaN     |
| Estrogen Receptor Signaling                                                  | 2.84E+00      | 7.09E-02 | 0.243   |
| Clathrin-mediated Endocytosis Signaling                                      | 2.83E+00      | 8.81E-02 | NaN     |

**Supplemental Table 5: Cellular networks impacted by SARS-CoV-2 infection within myeloid cells in unvaccinated animals (day 2 post challenge) relative to vaccinated animals (day 2 post challenge)**

| Ingenuity Canonical Pathways                                                  | -log(p-value) | Ratio    | z-score |
|-------------------------------------------------------------------------------|---------------|----------|---------|
| EIF2 Signaling                                                                | 4.75E+01      | 3.30E-01 | -5.154  |
| Coronavirus Pathogenesis Pathway                                              | 2.46E+01      | 2.41E-01 | 3.464   |
| Regulation of eIF4 and p70S6K Signaling                                       | 1.71E+01      | 2.12E-01 | NaN     |
| mTOR Signaling                                                                | 1.53E+01      | 1.84E-01 | 0       |
| FAT10 Signaling Pathway                                                       | 1.51E+01      | 3.75E-01 | 1       |
| BAG2 Signaling Pathway                                                        | 1.41E+01      | 2.86E-01 | 0       |
| Role of Hypercytokinemia/hyperchemokinememia in the Pathogenesis of Influenza | 1.29E+01      | 2.67E-01 | 4.796   |
| Interferon Signaling                                                          | 1.18E+01      | 4.17E-01 | 3.742   |
| Huntington's Disease Signaling                                                | 1.05E+01      | 1.34E-01 | -1.604  |
| Mitochondrial Dysfunction                                                     | 9.94E+00      | 1.64E-01 | NaN     |
| Protein Ubiquitination Pathway                                                | 9.12E+00      | 1.27E-01 | NaN     |
| Inhibition of ARE-Mediated mRNA Degradation Pathway                           | 8.45E+00      | 1.55E-01 | 2.333   |
| Sirtuin Signaling Pathway                                                     | 8.42E+00      | 1.20E-01 | 0.186   |
| Atherosclerosis Signaling                                                     | 8.16E+00      | 1.68E-01 | NaN     |
| Role of Pattern Recognition Receptors in Recognition of Bacteria and Viruses  | 8.06E+00      | 1.54E-01 | 3.207   |
| Oxidative Phosphorylation                                                     | 8.02E+00      | 1.80E-01 | -2.236  |
| Role of PKR in Interferon Induction and Antiviral Response                    | 7.85E+00      | 1.62E-01 | 2.837   |
| Activation of IRF by Cytosolic Pattern Recognition Receptors                  | 7.67E+00      | 2.31E-01 | 1.807   |
| Necroptosis Signaling Pathway                                                 | 7.34E+00      | 1.46E-01 | 3.128   |
| LXR/RXR Activation                                                            | 7.23E+00      | 1.63E-01 | 0       |
| Acute Phase Response Signaling                                                | 7.21E+00      | 1.35E-01 | 2.524   |
| Granulocyte Adhesion and Diapedesis                                           | 7.03E+00      | 1.32E-01 | NaN     |
| Death Receptor Signaling                                                      | 6.80E+00      | 1.77E-01 | 1       |
| TREM1 Signaling                                                               | 6.63E+00      | 1.95E-01 | 3.873   |
| Phagosome Maturation                                                          | 6.61E+00      | 1.38E-01 | NaN     |
| Pathogenesis of Multiple Sclerosis                                            | 6.59E+00      | 6.67E-01 | NaN     |
| Iron homeostasis signaling pathway                                            | 6.34E+00      | 1.44E-01 | NaN     |
| HIF1 $\alpha$ Signaling                                                       | 6.22E+00      | 1.20E-01 | 2.2     |
| Neuroinflammation Signaling Pathway                                           | 6.03E+00      | 1.01E-01 | 4.017   |
| Complement System                                                             | 6.00E+00      | 2.70E-01 | 0.707   |

**Supplemental Table 6: Cellular networks impacted by SARS-CoV-2 infection within dendritic cells in unvaccinated animals (day 2 post challenge) relative to vaccinated animals (day 2 post challenge)**

| <b>Ingenuity Canonical Pathways</b>                                          | <b>-log(p-value)</b> | <b>Ratio</b> | <b>z-score</b> |
|------------------------------------------------------------------------------|----------------------|--------------|----------------|
| EIF2 Signaling                                                               | 4.51E+01             | 4.29E-01     | -4.808         |
| Regulation of eIF4 and p70S6K Signaling                                      | 2.33E+01             | 3.46E-01     | -2.309         |
| Mitochondrial Dysfunction                                                    | 2.29E+01             | 3.51E-01     | NaN            |
| Coronavirus Pathogenesis Pathway                                             | 2.15E+01             | 3.15E-01     | 0.508          |
| Oxidative Phosphorylation                                                    | 2.12E+01             | 4.14E-01     | 2.236          |
| Huntington's Disease Signaling                                               | 1.93E+01             | 2.61E-01     | -0.962         |
| BAG2 Signaling Pathway                                                       | 1.82E+01             | 4.40E-01     | 0              |
| FAT10 Signaling Pathway                                                      | 1.68E+01             | 5.18E-01     | 0.447          |
| Sirtuin Signaling Pathway                                                    | 1.61E+01             | 2.40E-01     | 0.143          |
| mTOR Signaling                                                               | 1.56E+01             | 2.69E-01     | -1.147         |
| Protein Ubiquitination Pathway                                               | 1.47E+01             | 2.36E-01     | NaN            |
| Estrogen Receptor Signaling                                                  | 1.26E+01             | 1.93E-01     | 0              |
| TREM1 Signaling                                                              | 1.15E+01             | 3.64E-01     | -1.177         |
| Inhibition of ARE-Mediated mRNA Degradation Pathway                          | 1.12E+01             | 2.61E-01     | -0.688         |
| Glucocorticoid Receptor Signaling                                            | 1.09E+01             | 1.65E-01     | NaN            |
| Role of Hypercytokinemia/hyperchemokineemia in the Pathogenesis of Influenza | 1.09E+01             | 3.37E-01     | 2.414          |
| Role of PKR in Interferon Induction and Antiviral Response                   | 9.92E+00             | 2.65E-01     | 0.539          |
| Insulin Secretion Signaling Pathway                                          | 9.67E+00             | 2.01E-01     | 2.722          |
| Interferon Signaling                                                         | 9.32E+00             | 4.72E-01     | 2.5            |
| Production of Nitric Oxide and Reactive Oxygen Species in Macrophages        | 9.26E+00             | 2.25E-01     | -1.808         |
| PI3K/AKT Signaling                                                           | 9.19E+00             | 2.21E-01     | -1.225         |
| Toll-like Receptor Signaling                                                 | 8.97E+00             | 3.21E-01     | 0.535          |
| Neuroinflammation Signaling Pathway                                          | 8.92E+00             | 1.86E-01     | -0.42          |
| HER-2 Signaling in Breast Cancer                                             | 8.77E+00             | 2.07E-01     | -0.447         |
| Necroptosis Signaling Pathway                                                | 8.64E+00             | 2.36E-01     | 1.808          |
| Signaling by Rho Family GTPases                                              | 8.58E+00             | 1.94E-01     | -1.859         |
| RAC Signaling                                                                | 8.53E+00             | 2.46E-01     | -2.2           |
| Hypoxia Signaling in the Cardiovascular System                               | 8.50E+00             | 3.16E-01     | -1.134         |
| Activation of IRF by Cytosolic Pattern Recognition Receptors                 | 7.72E+00             | 3.23E-01     | 1.606          |
| Induction of Apoptosis by HIV1                                               | 7.72E+00             | 3.23E-01     | 0.471          |



**Supplemental Table 7: Cellular networks impacted by SARS-CoV-2 infection within lymphocytes in unvaccinated animals (day 2 post challenge) relative to vaccinated animals (day 2 post challenge)**

| <b>Ingenuity Canonical Pathways</b>                                          | <b>-log(p-value)</b> | <b>Ratio</b> | <b>z-score</b> |
|------------------------------------------------------------------------------|----------------------|--------------|----------------|
| Coronavirus Pathogenesis Pathway                                             | 1.49E+01             | 1.92E-01     | 0.164          |
| FAT10 Signaling Pathway                                                      | 1.45E+01             | 3.75E-01     | 0.447          |
| EIF2 Signaling                                                               | 1.27E+01             | 1.70E-01     | -1.528         |
| Interferon Signaling                                                         | 1.26E+01             | 4.44E-01     | 2.84           |
| BAG2 Signaling Pathway                                                       | 1.15E+01             | 2.62E-01     | -2.646         |
| Role of Hypercytokinemia/hyperchemokine in the Pathogenesis of Influenza     | 1.13E+01             | 2.56E-01     | 3.838          |
| Death Receptor Signaling                                                     | 1.11E+01             | 2.40E-01     | 0.853          |
| Sirtuin Signaling Pathway                                                    | 9.77E+00             | 1.34E-01     | 0.707          |
| Protein Ubiquitination Pathway                                               | 9.39E+00             | 1.35E-01     | NaN            |
| Huntington's Disease Signaling                                               | 9.04E+00             | 1.31E-01     | -2.138         |
| Mitochondrial Dysfunction                                                    | 8.54E+00             | 1.58E-01     | NaN            |
| Inhibition of ARE-Mediated mRNA Degradation Pathway                          | 8.46E+00             | 1.61E-01     | -0.302         |
| Oxidative Phosphorylation                                                    | 8.21E+00             | 1.89E-01     | -4.146         |
| Activation of IRF by Cytosolic Pattern Recognition Receptors                 | 8.12E+00             | 2.46E-01     | 1.5            |
| Primary Immunodeficiency Signaling                                           | 7.28E+00             | 2.50E-01     | NaN            |
| PI3K Signaling in B Lymphocytes                                              | 6.88E+00             | 1.54E-01     | 2.183          |
| Antigen Presentation Pathway                                                 | 6.42E+00             | 2.82E-01     | NaN            |
| Role of PKR in Interferon Induction and Antiviral Response                   | 5.99E+00             | 1.47E-01     | 2.236          |
| Crosstalk between Dendritic Cells and Natural Killer Cells                   | 5.96E+00             | 1.76E-01     | 1.604          |
| Glucocorticoid Receptor Signaling                                            | 5.87E+00             | 8.61E-02     | NaN            |
| Necroptosis Signaling Pathway                                                | 5.57E+00             | 1.34E-01     | 2.4            |
| Phagosome Maturation                                                         | 5.48E+00             | 1.32E-01     | NaN            |
| TREM1 Signaling                                                              | 5.47E+00             | 1.82E-01     | 2.138          |
| Natural Killer Cell Signaling                                                | 5.46E+00             | 1.21E-01     | 1.043          |
| TNFR2 Signaling                                                              | 5.34E+00             | 2.81E-01     | -1.134         |
| TNFR1 Signaling                                                              | 5.08E+00             | 2.12E-01     | -1.897         |
| Role of Pattern Recognition Receptors in Recognition of Bacteria and Viruses | 5.06E+00             | 1.28E-01     | 1.508          |
| Neuroinflammation Signaling Pathway                                          | 4.93E+00             | 9.78E-02     | 1.569          |
| Agranulocyte Adhesion and Diapedesis                                         | 4.92E+00             | 1.12E-01     | NaN            |
| NAD Signaling Pathway                                                        | 4.72E+00             | 1.26E-01     | 1              |

**Supplemental Table 8: Cellular networks impacted by SARS-CoV-2 infection within lymphocytes in unvaccinated animals (day 2 post challenge) relative to vaccinated animals (day 2 post challenge)**

| <b>Ingenuity Canonical Pathways</b>                                          | <b>-log(p-value)</b> | <b>Ratio</b> | <b>z-score</b> |
|------------------------------------------------------------------------------|----------------------|--------------|----------------|
| EIF2 Signaling                                                               | 3.47E+01             | 2.77E-01     | -4.49          |
| Coronavirus Pathogenesis Pathway                                             | 2.19E+01             | 2.27E-01     | 1.043          |
| Regulation of eIF4 and p70S6K Signaling                                      | 1.71E+01             | 2.12E-01     | -2.236         |
| mTOR Signaling                                                               | 1.46E+01             | 1.79E-01     | -1.897         |
| Role of Hypercytokinemia/hyperchemokineemia in the Pathogenesis of Influenza | 8.35E+00             | 2.09E-01     | 2.828          |
| Actin Cytoskeleton Signaling                                                 | 8.09E+00             | 1.27E-01     | -1.8           |
| Interferon Signaling                                                         | 7.15E+00             | 3.06E-01     | 2.53           |
| Mitochondrial Dysfunction                                                    | 6.65E+00             | 1.35E-01     | NaN            |
| Germ Cell-Sertoli Cell Junction Signaling                                    | 6.65E+00             | 1.35E-01     | NaN            |
| RAC Signaling                                                                | 5.76E+00             | 1.38E-01     | -2             |
| Remodeling of Epithelial Adherens Junctions                                  | 5.73E+00             | 1.91E-01     | -1.633         |
| ILK Signaling                                                                | 5.45E+00             | 1.15E-01     | -1.789         |
| Ferroptosis Signaling Pathway                                                | 5.43E+00             | 1.36E-01     | -1.414         |
| Sirtuin Signaling Pathway                                                    | 5.39E+00             | 9.93E-02     | 0.218          |
| Production of Nitric Oxide and Reactive Oxygen Species in Macrophages        | 5.25E+00             | 1.15E-01     | -3.13          |
| Role of PKR in Interferon Induction and Antiviral Response                   | 5.24E+00             | 1.32E-01     | 0              |
| Complement System                                                            | 5.04E+00             | 2.43E-01     | -1.342         |
| Integrin Signaling                                                           | 4.99E+00             | 1.08E-01     | -1.606         |
| Leukotriene Biosynthesis                                                     | 4.90E+00             | 4.00E-01     | -0.447         |
| Signaling by Rho Family GTPases                                              | 4.72E+00             | 9.70E-02     | -2.132         |
| Leukocyte Extravasation Signaling                                            | 4.66E+00             | 1.09E-01     | -1.213         |
| Oxidative Phosphorylation                                                    | 4.58E+00             | 1.35E-01     | -1.807         |
| RHOGDI Signaling                                                             | 4.44E+00             | 1.02E-01     | 0.728          |
| Activation of IRF by Cytosolic Pattern Recognition Receptors                 | 4.42E+00             | 1.69E-01     | 0.905          |
| Atherosclerosis Signaling                                                    | 4.29E+00             | 1.22E-01     | NaN            |
| NRF2-mediated Oxidative Stress Response                                      | 4.25E+00             | 9.70E-02     | -1.941         |
| Sertoli Cell-Sertoli Cell Junction Signaling                                 | 4.24E+00             | 1.02E-01     | NaN            |
| Eicosanoid Signaling                                                         | 4.23E+00             | 1.62E-01     | 0.447          |
| IL-8 Signaling                                                               | 4.12E+00             | 1.00E-01     | -2.524         |
| Epithelial Adherens Junction Signaling                                       | 3.86E+00             | 1.08E-01     | 0.243          |
